# Supplementary material
Source: publisher figshare collection journal article supplement (https://tandf.figshare.com/ndownloader/files/14530757)
Supplement: Supplementary file 1 [file 14530757]

## Sheet: Sheet1
	Supplement Table 2. Demographic characteristics of the patient cohort in validating stage .
	Demographic	Frequency (%)
	Age, years
	<60y	59 (58.4)
	≥60y	42(41.6)
	Gender
	Male	53(52.5)
	Female	48(47.5)
	Smoking history
	Yes	49(48.5)
	No	52(51.5)
	Alcohol history
	Yes	40(39.6)
	No	61(60.4)
	Histopathological grade (differentiation)
	Well/moderate	37(36.6)
	Poor	64(63.4)
	Tumor size
	T1+T2	61(60.4)
	T3+T4	40(39.6)
	lymph node metastasis
	N0	27(26.7)
	N1+	74(73.3)
